# Supplementary material for: Auto-Ubiquitination-Induced Degradation of MALT1-API2 Prevents BCL10 Destabilization in t(11;18)(q21;q21)-Positive MALT Lymphoma
Source: PubMed Central journal article supplement (PMC2652110; doi:10.1371/journal.pone.0004822), 2009-03-12

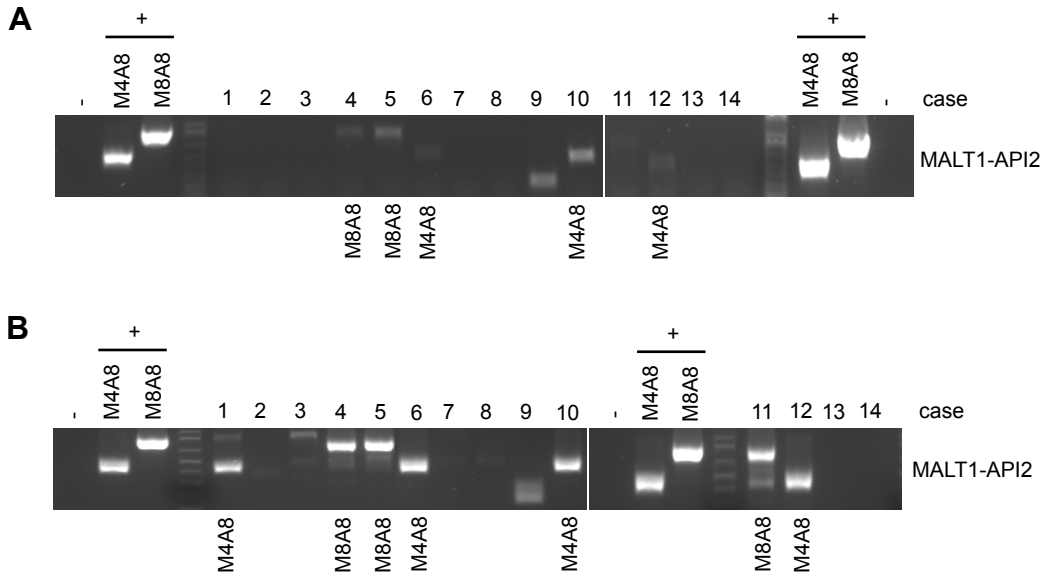

Supplement: pone.0004822.s001.pdf [file pone.0004822.s001.pdf]
